# Supplementary material
Source: publisher figshare collection journal article supplement (https://frontiersin.figshare.com/ndownloader/files/27076256)

**Day 1**  
**Strongly Annoying**

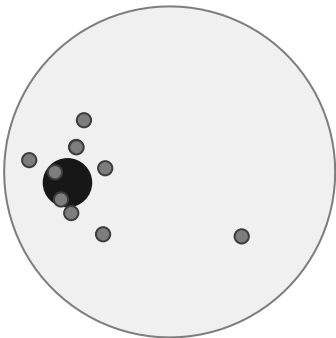

**Day 2**  
**Uneventful**

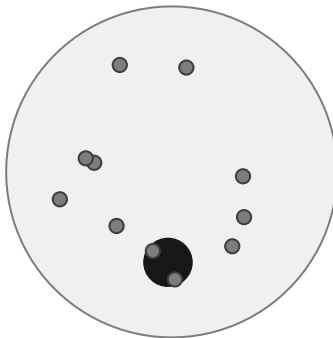

**Day 3**  
**Chaotic**

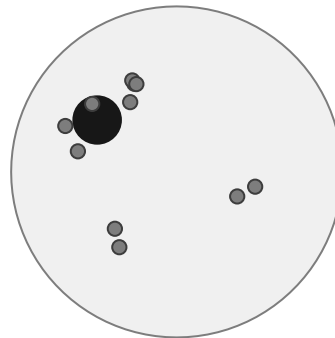

**Day 4**  
**Extremely Annoying**

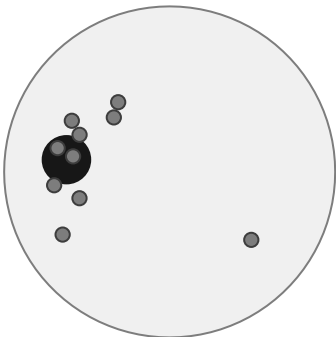

**Day 5**  
**Somewhat Chaotic**

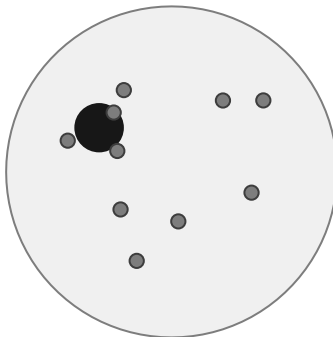

**Day 6**  
**Strongly Monotonous**

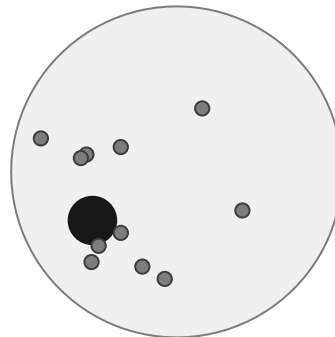

**Day 7**  
**Somewhat Annoying**

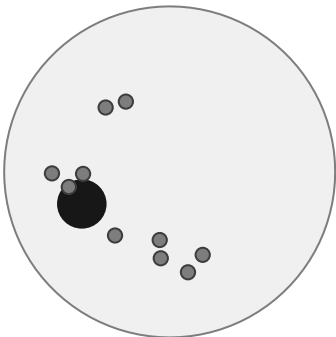

**Day 8**  
**Somewhat Calm**

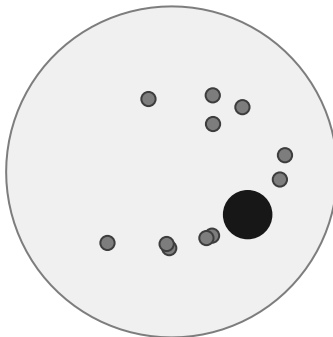

**Day 9**  
**Chaotic**

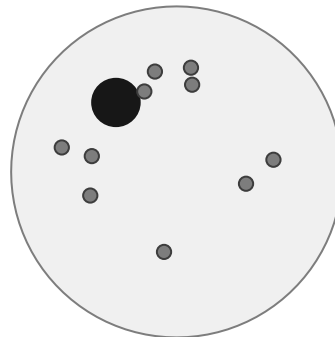

**Day 10**  
**Strongly Annoying**

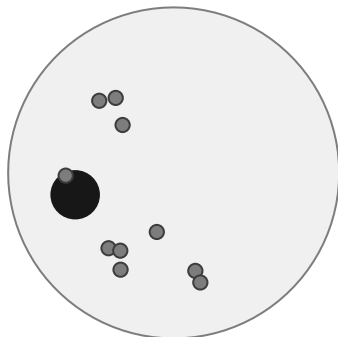

**Day 11**  
**Strongly Chaotic**

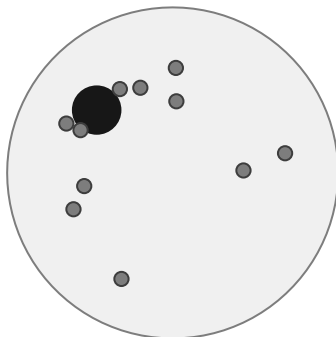

**Day 12**  
**Somewhat Annoying**

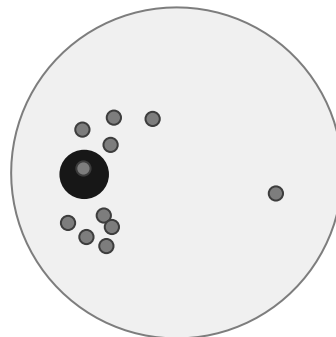

**Day 13**  
**Somewhat Annoying**

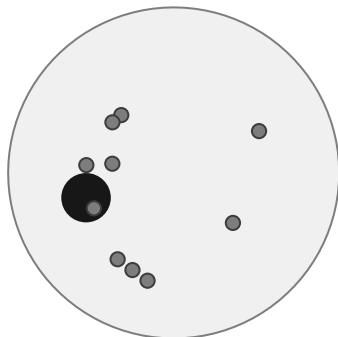

**Day 14**  
**Extremely Calm**

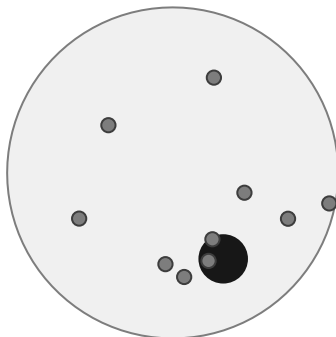

**Day 15**  
**Somewhat Uneventful**

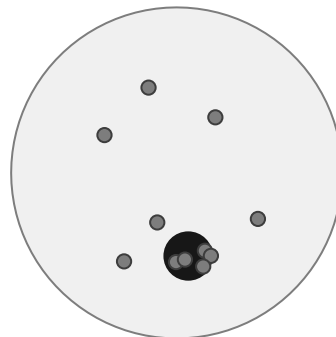

**Day 16**  
**Annoying**

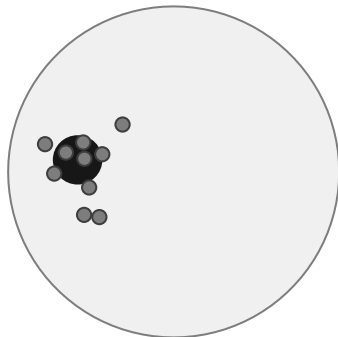

**Day 17**  
**Strongly Uneventful**

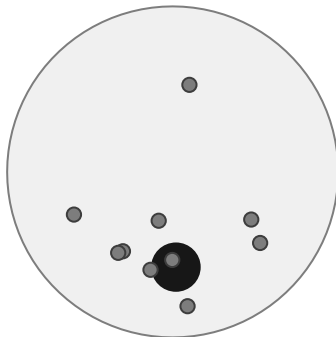

**Day 18**  
**Somewhat Chaotic**

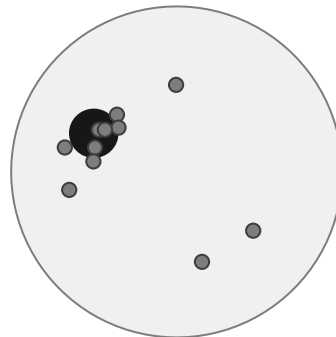

**Day 19**  
**Extremely Uneventful**

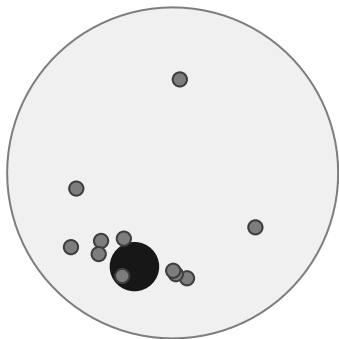

**Day 20**  
**Strongly Calm**

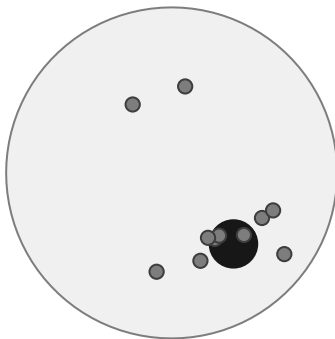

**Day 21**  
**Somewhat Uneventful**

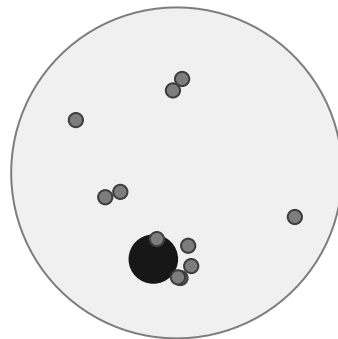

**Day 22**  
**Uneventful**

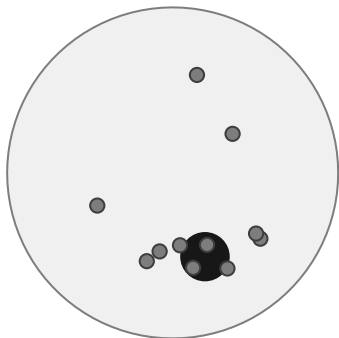

**Day 23**  
**Extremely Chaotic**

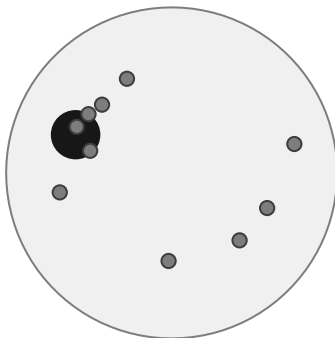

**Day 24**  
**Calm**

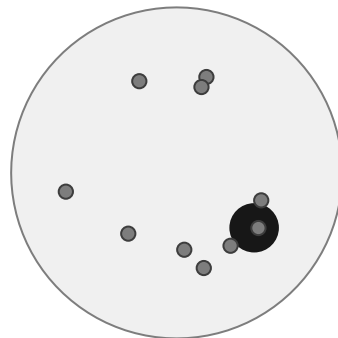

**Day 25**  
**Eventful**

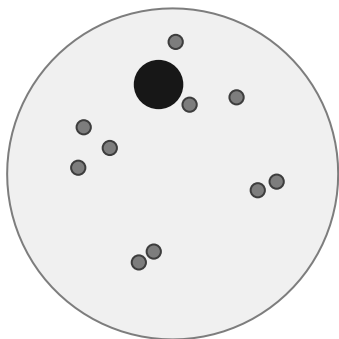

**Day 26**  
**Strongly Calm**

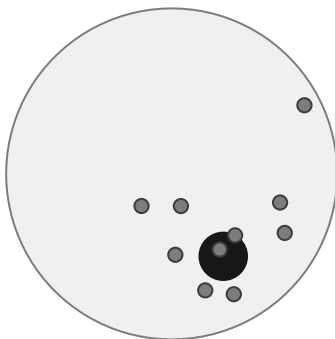

**Day 27**  
**Monotonous**

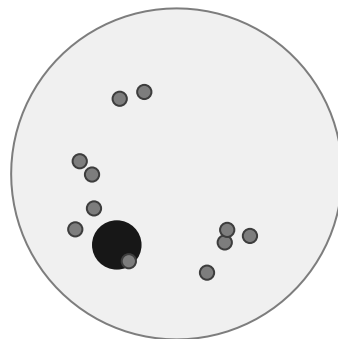

**Day 28**  
**Extremely Pleasant**

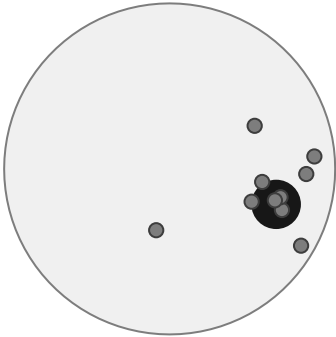

**Day 29**  
**Annoying**

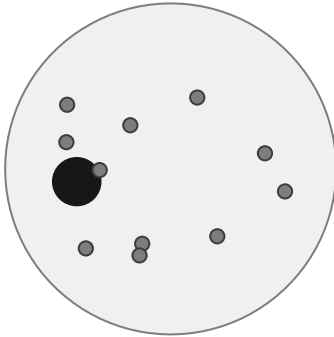

**Day 30**  
**Extremely Uneventful**

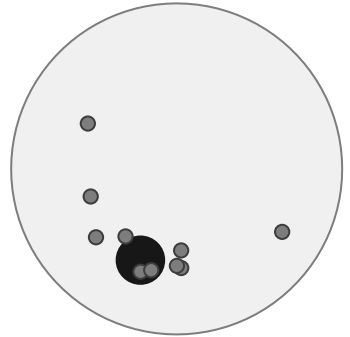

**Day 31**  
**Monotonous**

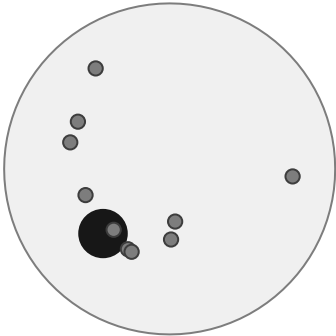

**Day 34**  
**Strongly Uneventful**

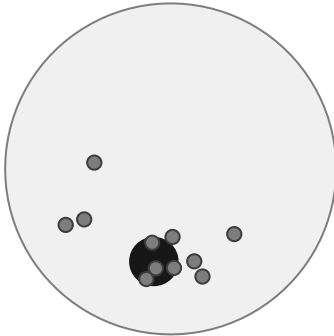

**Day 35**  
**Extremely Exciting**

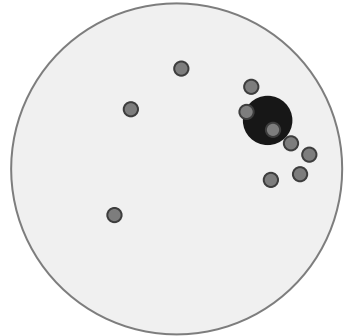

**Day 37**  
**Somewhat Monotonous**

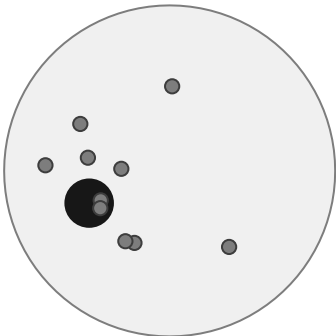

**Day 38**  
**Strongly Exciting**

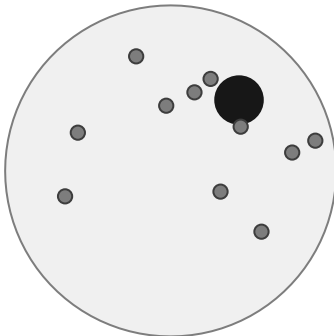

**Day 39**  
**Calm**

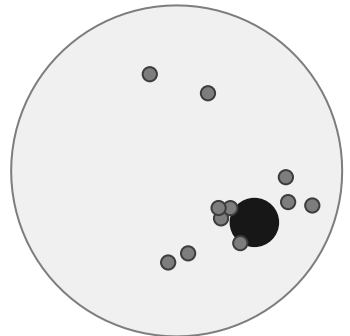

**Day 41**  
**Strongly Chaotic**

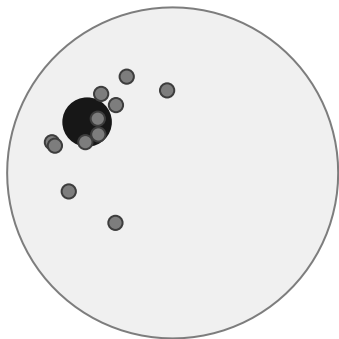

**Day 46**  
**Strongly Eventful**

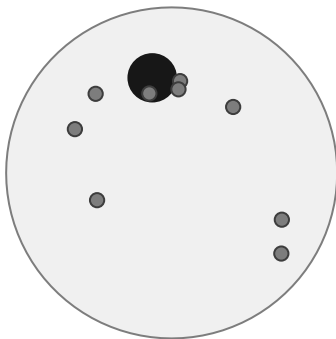

**Day 47**  
**Extremely Chaotic**

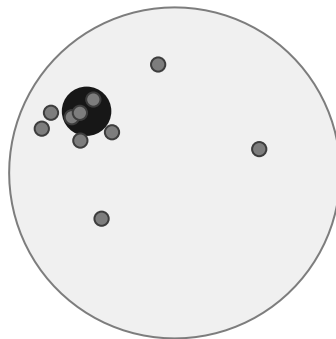

**Day 48**  
**Extremely Chaotic**

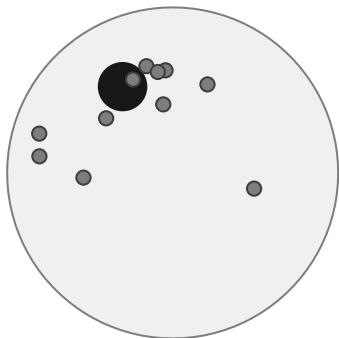

**Day 49**  
**Extremely Chaotic**

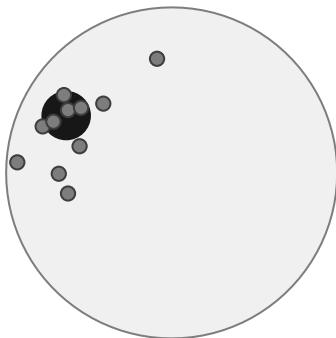

**Day 51**  
**Extremely Monotonous**

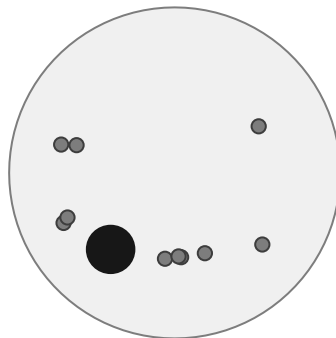

**Day 52**  
**Strongly Annoying**

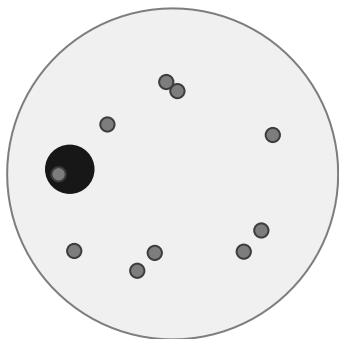

**Day 54**  
**Somewhat Chaotic**

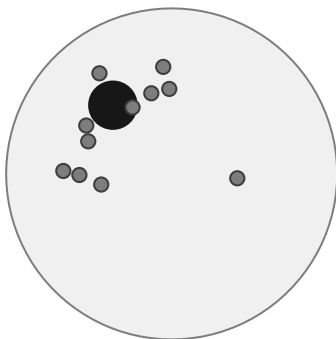

**Day 56**  
**Chaotic**

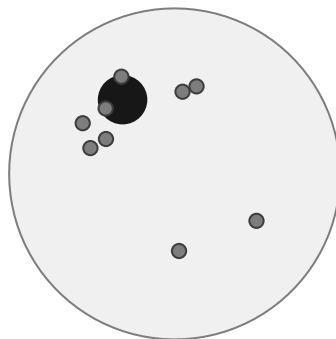

**Day 60**  
**Somewhat Chaotic**

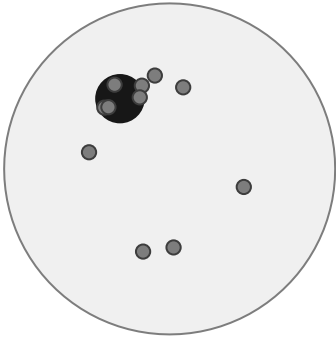

**Day 62**  
**Strongly Chaotic**

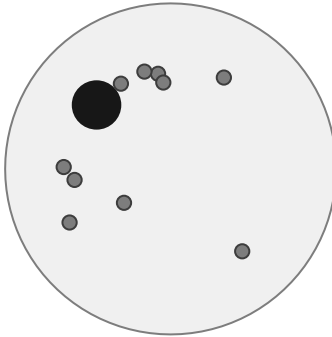

**Day 64**  
**Somewhat Eventful**

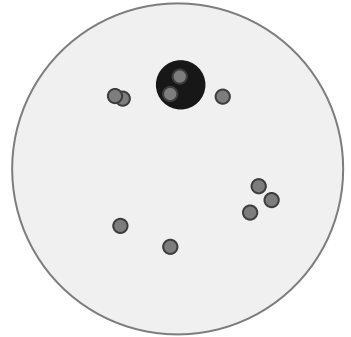

**Day 65**  
**Annoying**

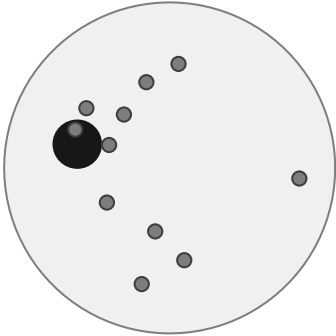

**Day 69**  
**Extremely Chaotic**

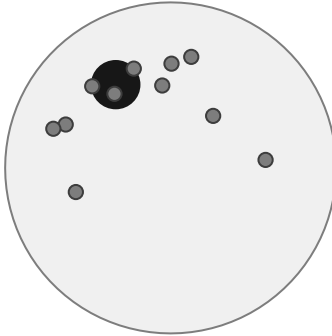

Supplement: Supplementary file [file 27076256]
